# Supplementary material
Source: publisher figshare collection journal article supplement (https://rs.figshare.com/ndownloader/files/9686806)
Supplement: Supplementary file [file 9686806]

**Open Biology**  
*Supplementary Material*

**Heparin-bound chemokine CXCL8 monomer and dimer are impaired  
for CXCR1 and CXCR2 activation: implications for gradients and  
neutrophil trafficking**

Prem Raj B. Joseph<sup>1,2</sup> , Kirti V. Sawant<sup>1,2</sup> and Krishna Rajarathnam<sup>1,2,3 \*</sup>

<sup>1</sup>Department of Biochemistry and Molecular Biology, University of Texas Medical Branch,  
Galveston, TX, USA.

<sup>2</sup>Sealy Center for Structural Biology and Molecular Biophysics, University of Texas Medical  
Branch, Galveston, TX, USA.

<sup>3</sup>Department of Microbiology and Immunology, University of Texas Medical Branch, Galveston,  
TX, USA.

**\*Author for Correspondence:**

Dr. Krishna Rajarathnam  
krrajara@utmb.edu

doi: 10.1098/rsob.170168

## Supplementary Figures

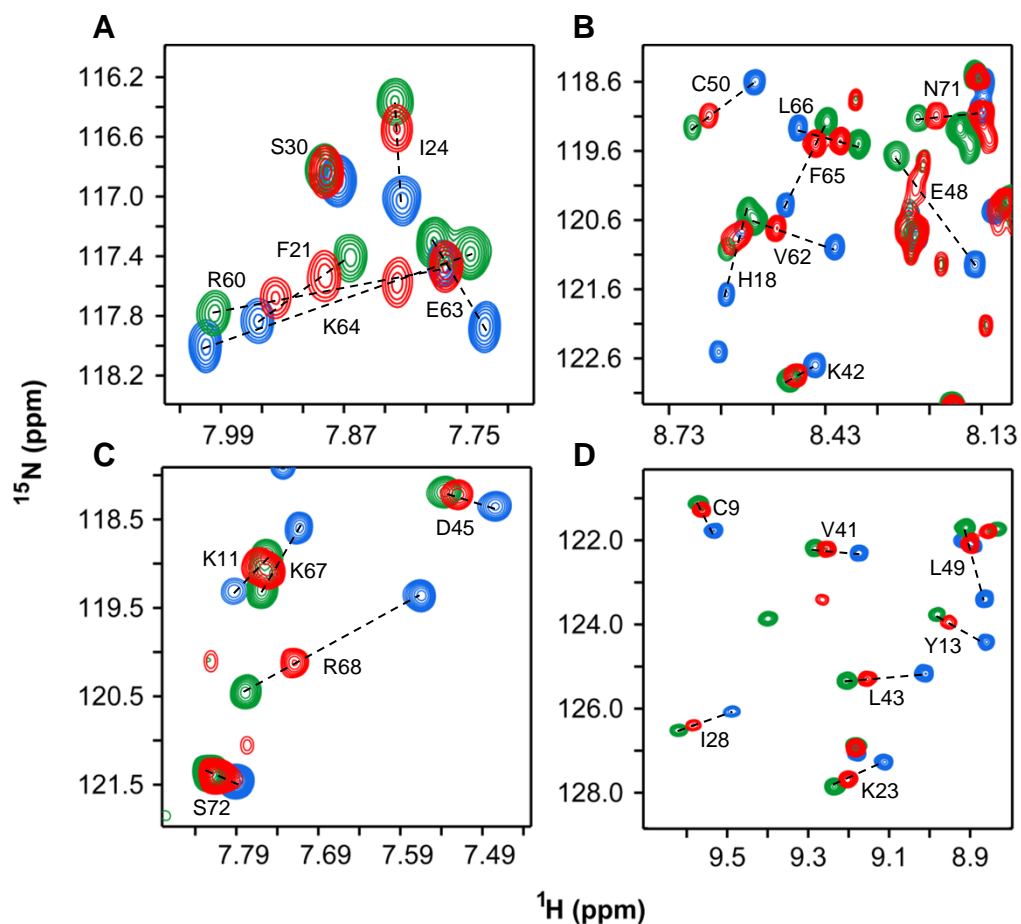

**Supplementary Figure 1.** Binding of CXCR1 N-domain to heparin-bound monomer. **(A-D)** Different sections of the  $^1\text{H}$ - $^{15}\text{N}$  HSQC spectrum showing binding profiles on R1 addition to M•dp8 complex. Dotted lines are drawn between the M•dp8 (blue) and M•R1 (green) complexes. The cross peaks that correspond to [M•dp8]+R1 (red) lie on this straight line.

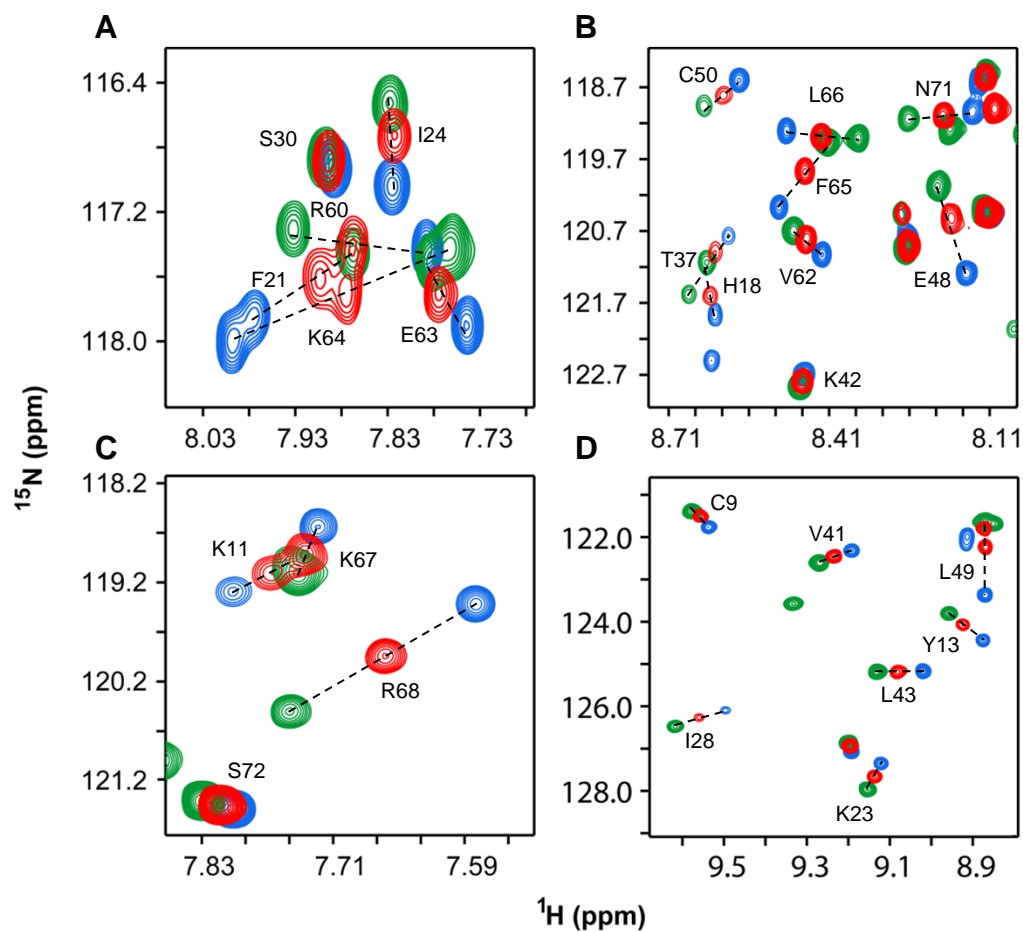

**Supplementary Figure 2.** Binding of CXCR2 N-domain to heparin-bound monomer. **(A-D)** Different sections of the  $^1\text{H}$ - $^{15}\text{N}$  HSQC spectrum showing binding profiles on R2 addition to M•dp8 complex. Dotted lines are drawn between the M•dp8 (blue) and M•R2 (green) complexes. The cross peaks corresponding to [M•dp8]+R2 (red) lie on this straight line.

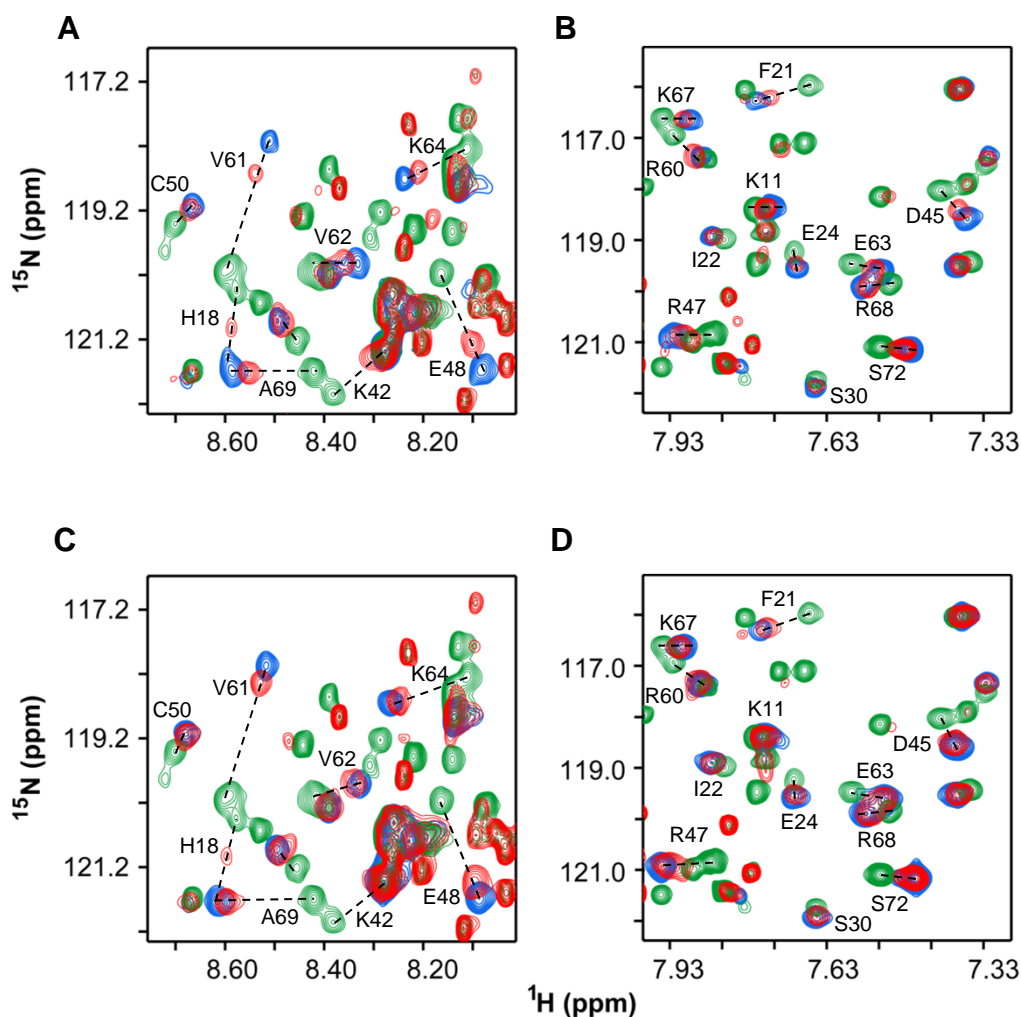

**Supplementary Figure 3.** Binding of CXCR1 N-domain to heparin-bound dimer. Different sections of the  $^1\text{H}$ - $^{15}\text{N}$  HSQC spectrum showing binding profiles of R1 addition to D•dp8 (panels **A** and **B**) and D•dp14 complexes (panels **C** and **D**). Dotted lines are drawn between the heparin-bound (blue) and R1-bound (green) complexes. For every residue, the cross peak (red) corresponding to [D•dp8]+R1 (panels **A** and **B**) or [D•dp14]+R1 (panels **C** and **D**) lies on the straight line joining the heparin-bound and R1-bound complexes.

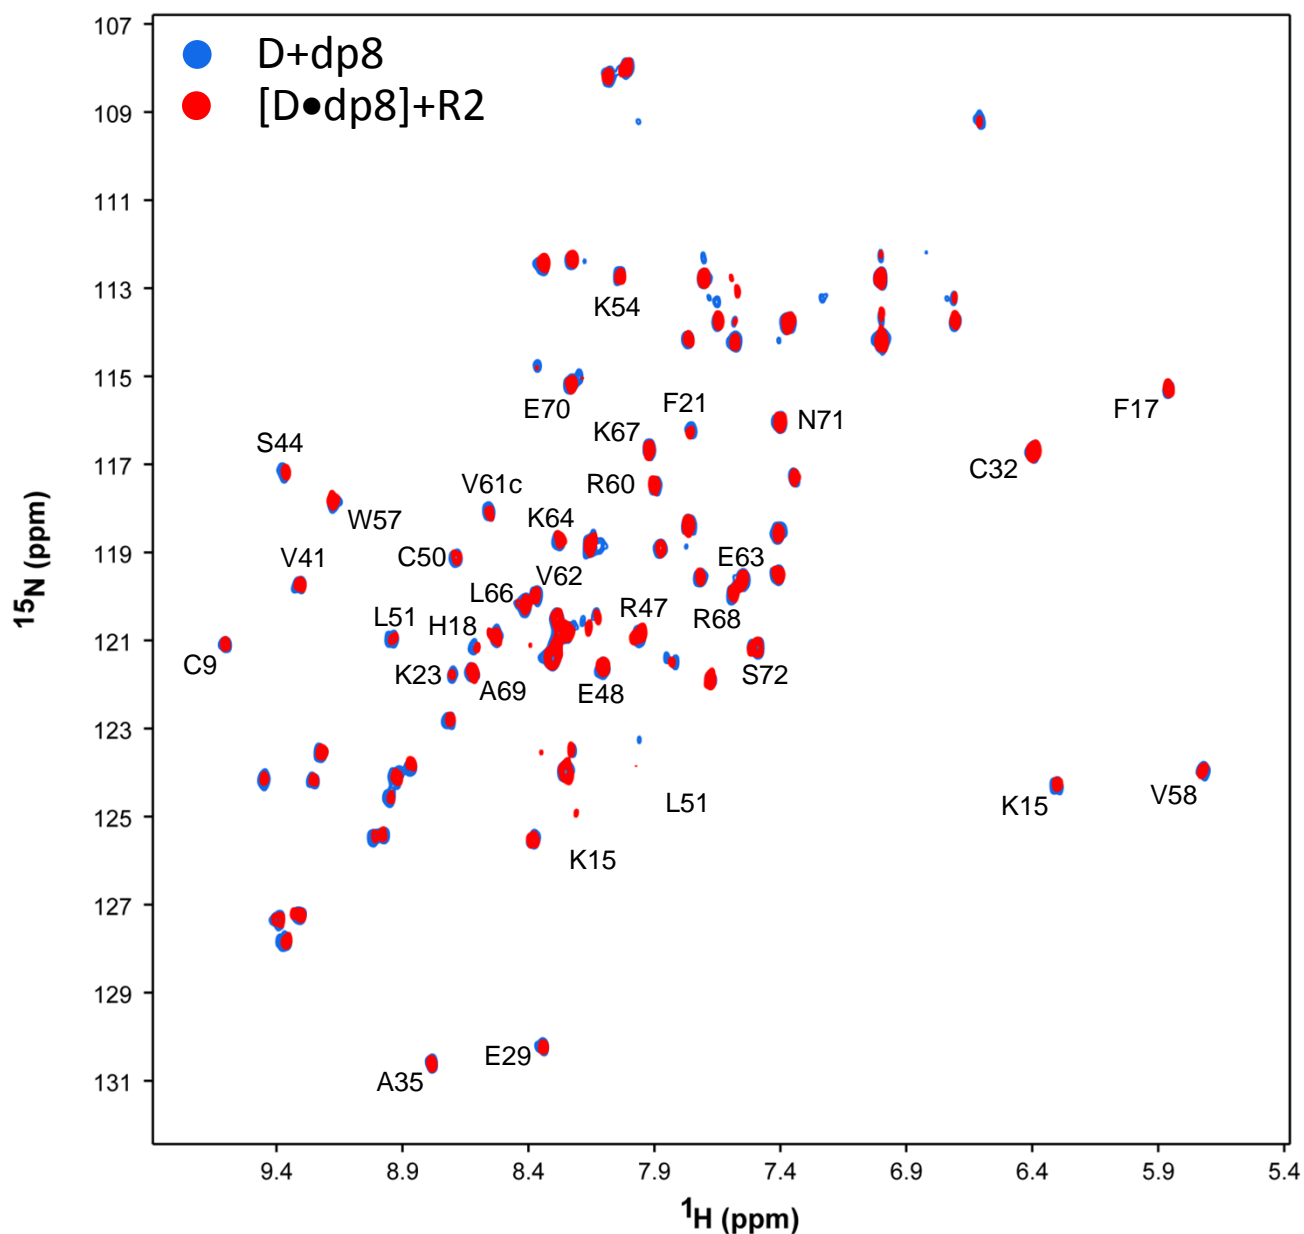

**Supplementary Figure 4.** Binding of CXCR2 N-domain to heparin-bound dimer.  $^1\text{H}$ - $^{15}\text{N}$  HSQC spectrum showing binding profiles on R2 addition to D•dp8 complex. Titration of R2 results in negligible chemical shift change, indicating that most of the protein exists in the GAG-bound form. The spectrum of the D.R2 is not shown for clarity. Further, in all cases, the new peaks (red) lie in a straight line between D•dp8 (blue) and D•R2 (not shown) complexes.

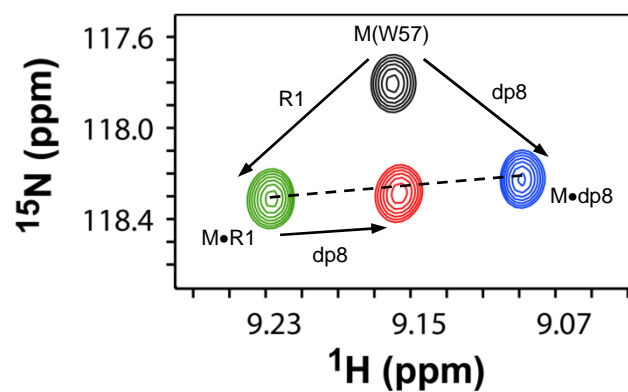

**Supplementary Figure 5.** Binding of heparin to CXCR1 N-domain-bound monomer. A section of the  $^1\text{H}$ - $^{15}\text{N}$  HSQC spectrum showing binding profile on dp8 addition to  $\text{M}\bullet\text{R1}$  complex. Dotted lines are drawn between the  $\text{M}\bullet\text{R1}$  (green) and  $\text{M}\bullet\text{dp8}$  (blue) complexes. The cross peaks corresponding to  $[\text{M}\bullet\text{dp8}]+\text{R1}$  (red) lie on this straight line.

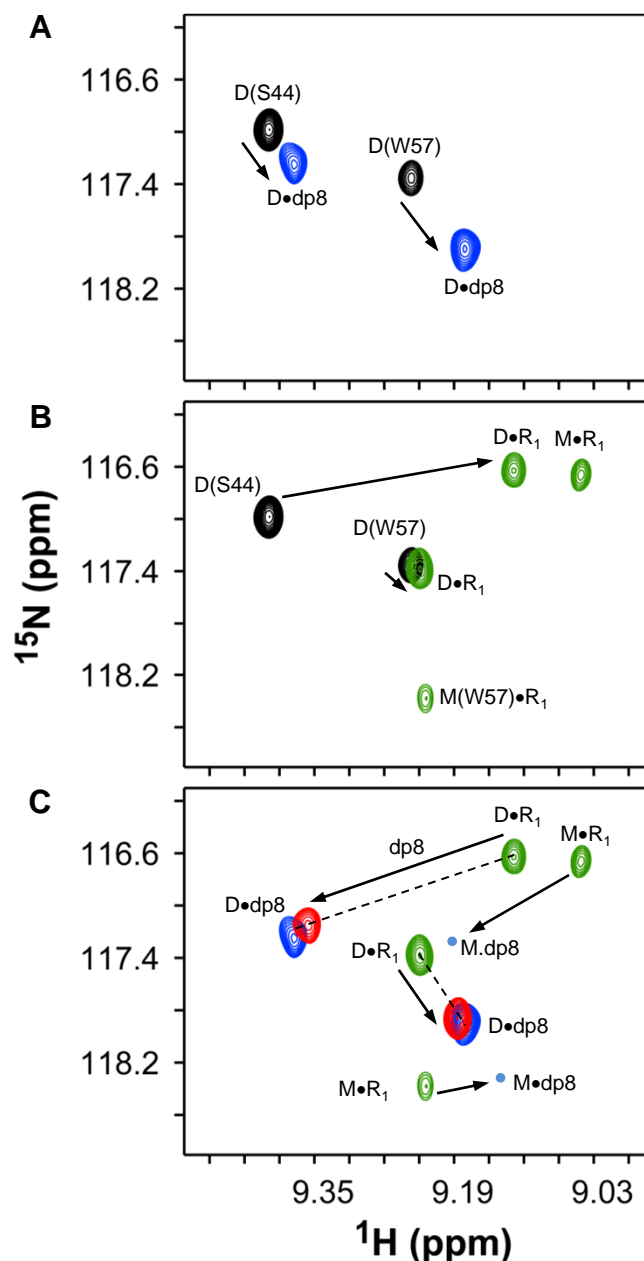

**Supplementary Figure 6.** Binding of heparin to CXCR1 N-domain-bound dimer. **(A)** Section of the  $^1\text{H}$ - $^{15}\text{N}$  HSQC spectrum showing heparin dp8 binding to CXCL8 dimer. The initial free (D) and final (D•GAG) cross peaks are shown in black and blue, respectively. **(B)** Section of the same region showing R1 binding to CXCL8 dimer. The free dimer (D) and bound monomer (M•R1) and dimer (D•R1) peaks are shown in black and green, respectively. **(C)** Section of the same region on dp8 addition to D•R1 complex. The final peaks (red) lie on a straight line between the dp8-bound and R1-bound peaks indicating no ternary complex formation. The lowly populated M.dp8 cross peaks (not seen at the contour level shown) are indicated as blue circles.
